# Supplementary material for: Ecological and evolutionary consequences of alternative sex-change pathways in fish
Source: PubMed Central journal article supplement (PMC5567342; doi:10.1038/s41598-017-09298-8), 2017-08-22
Supplement: 41598_2017_9298_MOESM1_ESM.pdf [file 41598_2017_9298_MOESM1_ESM.pdf]

## Supplementary Materials

### Ecological and evolutionary consequences of alternative sex-change pathways in fish

C. Benvenuto, I. Coscia, J. Chopelet, M. Sala-Bozano, S. Mariani

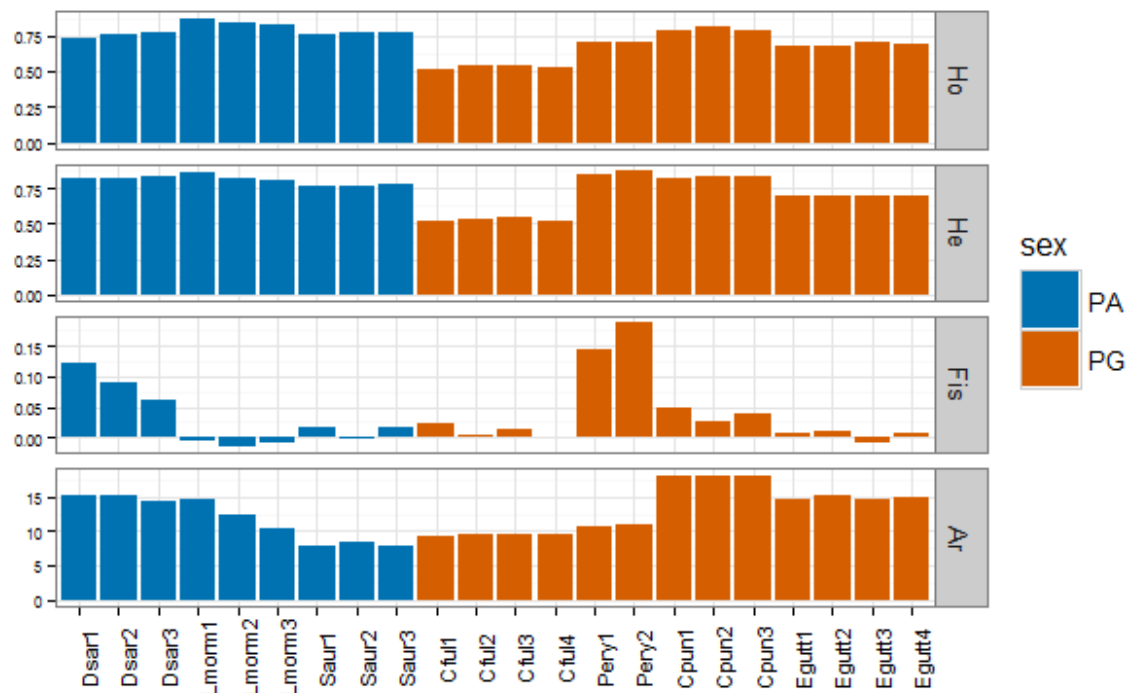

**Figure S1.** Estimates of observed ( $H_o$ ) and expected ( $H_e$ ) heterozygosities, coefficient of inbreeding ( $F_{is}$ ) and allelic richness ( $A_r$ ) for each population of the seven species under investigation.

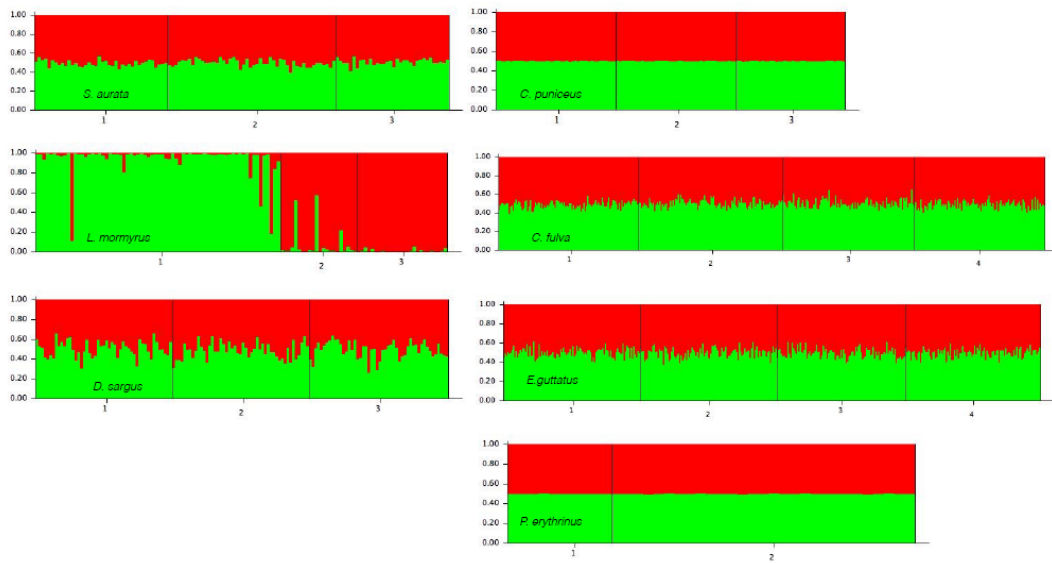

**Figure S2.** Population structure for each species obtained by STRUCTURE. Admixed individuals in population 1 and 2 (Atlantic and Tyrrhenian respectively) were also removed to provide alternative estimates of  $N_e$ , with not significant effects on those estimates.

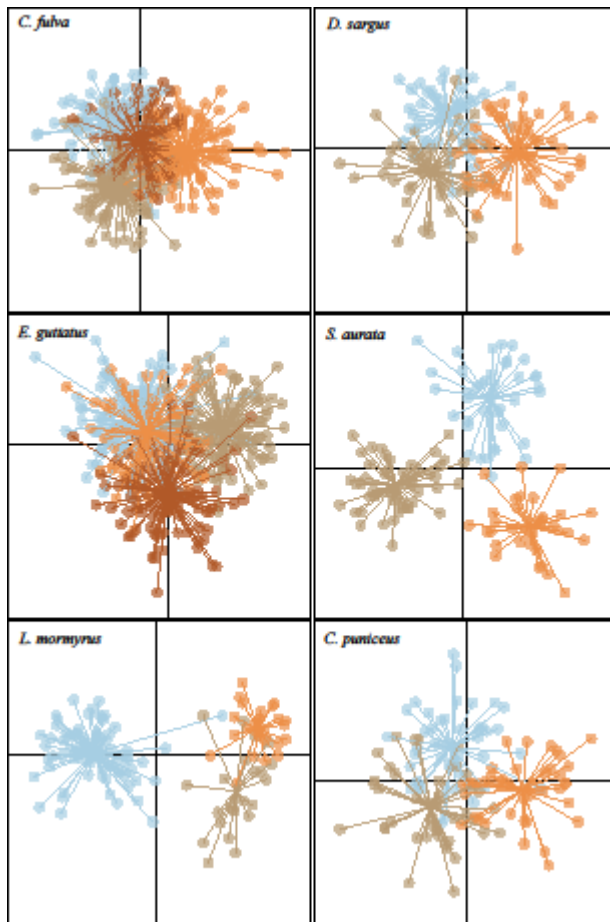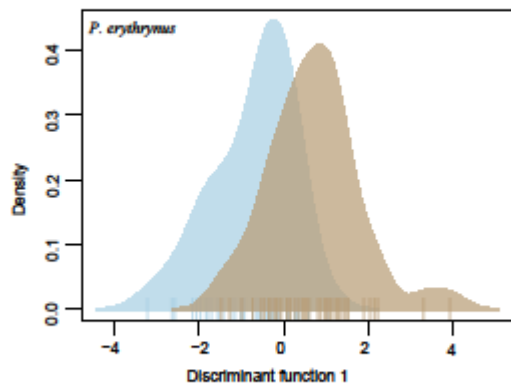

**Figure S3.** Population structure for each species obtained by Discriminant Analysis of Principal Components (DAPC). Each dot represents an individual and each colour a population. Below, the same analysis for *P. erythrinus*: here the results are not visualised as a scatter, but as a density plot, since there is only one discriminant component to visualise (there are only two populations).

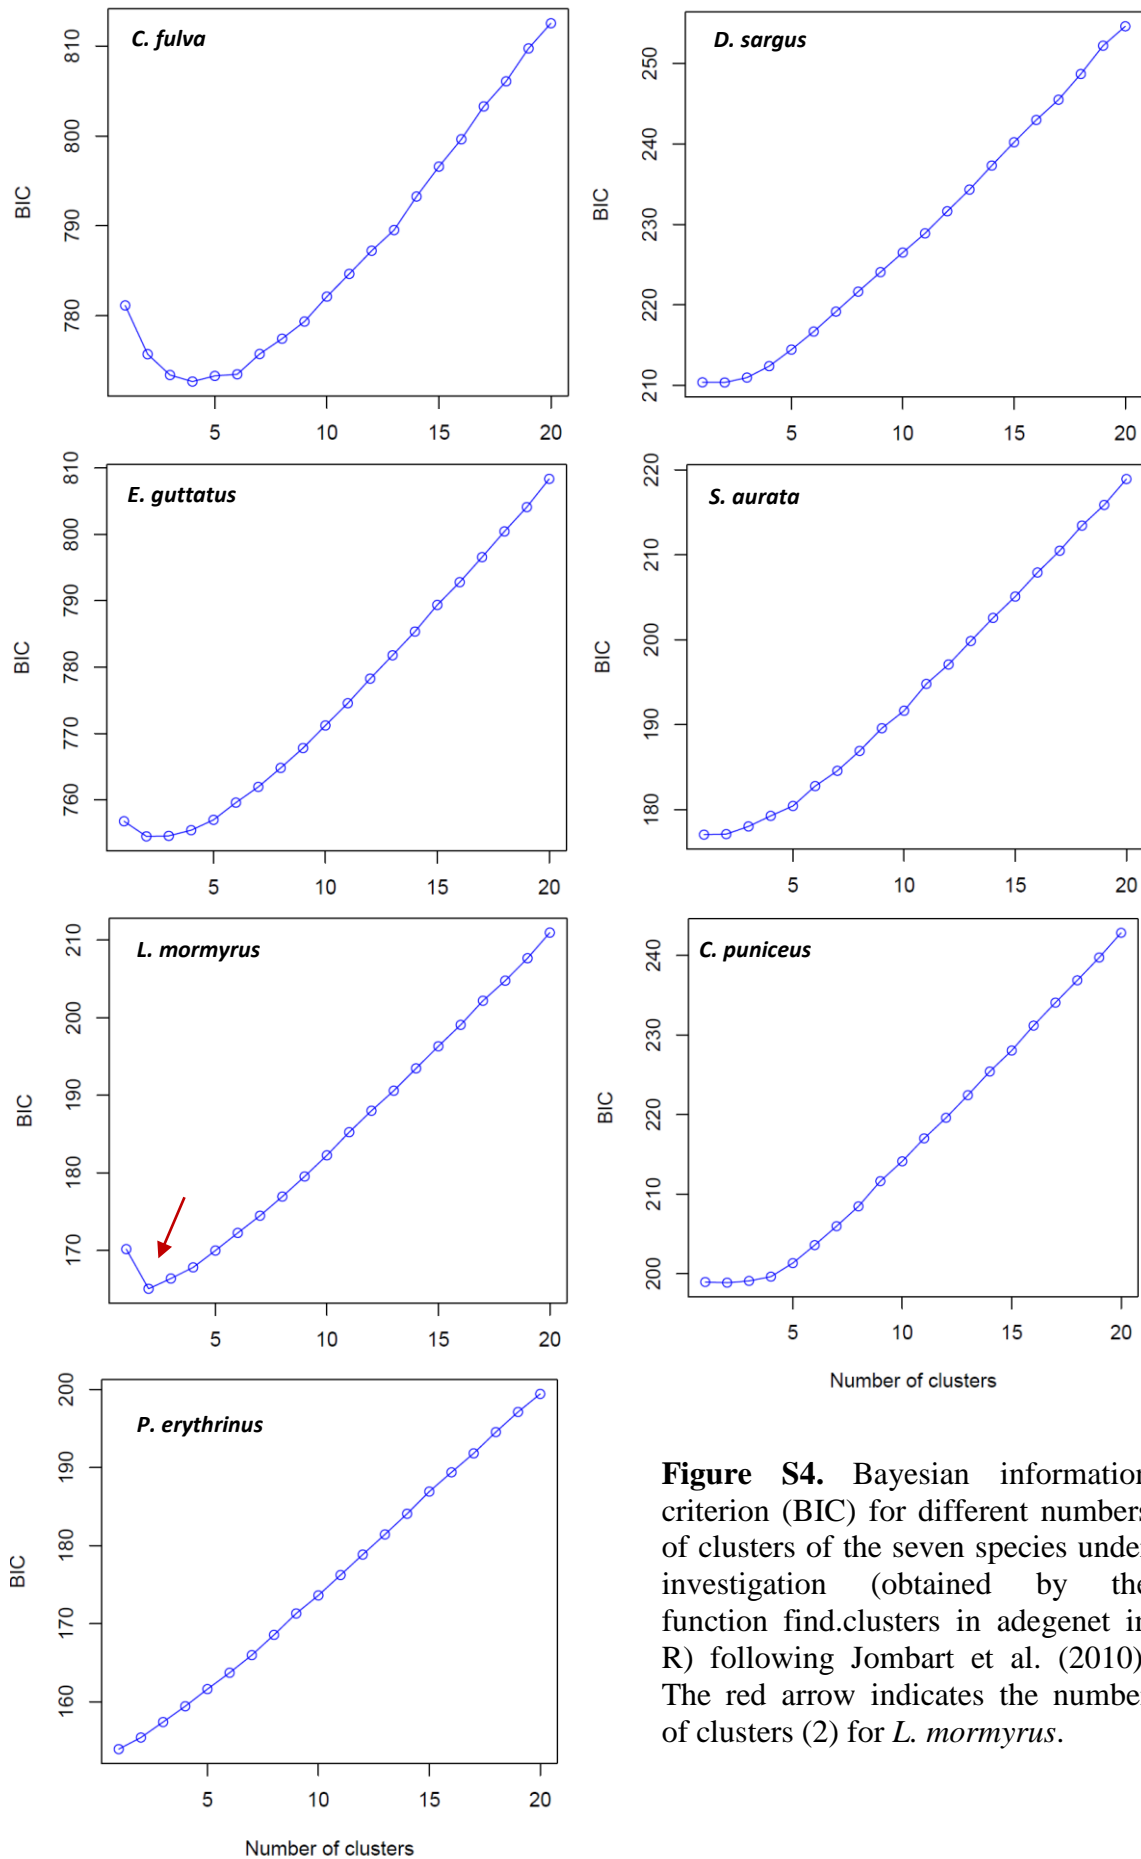

**Figure S4.** Bayesian information criterion (BIC) for different numbers of clusters of the seven species under investigation (obtained by the function `find.clusters` in `adeget` in R) following Jombart et al. (2010). The red arrow indicates the number of clusters (2) for *L. mormyrus*.

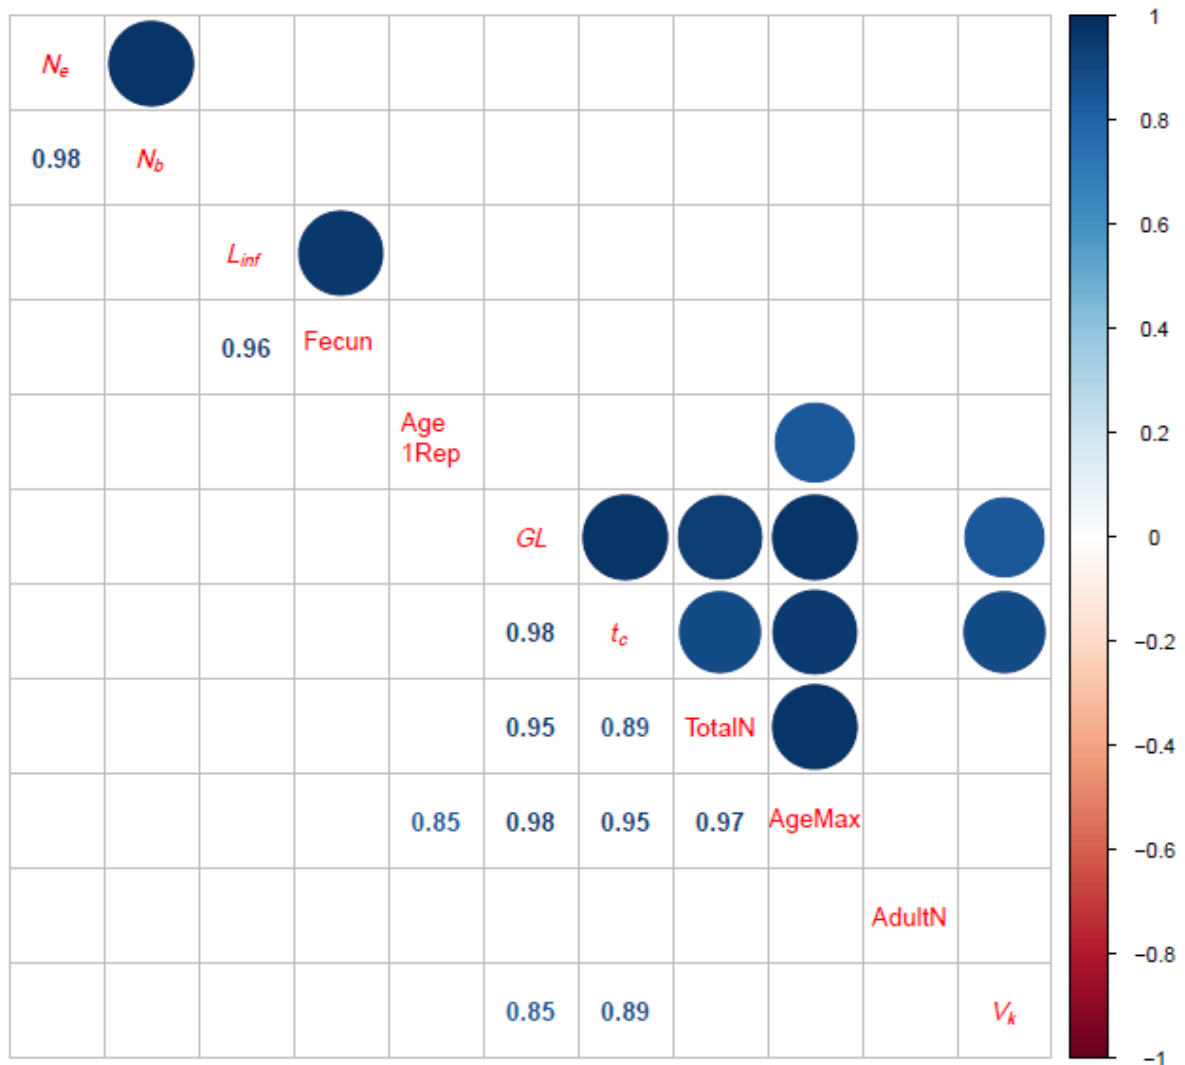

**Figure S5.** Correlation matrix (Spearman correlation) to check for multicollinearity among variables. Positive correlations are displayed in blue (only significant,  $p < 0.01$ ) in the upper diagonal of the correlogram; size and colour of the circles reflect the values of the correlation coefficient. The corresponding actual correlations values are displayed in the lower diagonal.  $N_e$ : effective population size;  $N_b$ : number breeders;  $L_{inf}$ : maximum length; Fecun: fecundity; Age1Rep: age at first reproduction;  $GL$ : generation length;  $t_c$ : age at sex change; TotalN: estimated number of individuals in the population; AgeMax: maximum age; AdultN: estimated number of adult individuals;  $V_k$ : variance in reproductive success.

**Table S1.** Observed and expected heterozygosity values ( $H_o$  and  $H_e$  respectively), inbreeding coefficient ( $F_{is}$ ) and p-value of the Hardy-Weinberg Equilibrium test (HWE) by locus and by population for each species.

| <i>D. sargus</i> | Ho   |      |      | He   |      |      | Fis   |      |       | HWE  |      |      |
|------------------|------|------|------|------|------|------|-------|------|-------|------|------|------|
|                  | Ds1  | Ds2  | Ds3  | Ds1  | Ds2  | Ds3  | Ds1   | Ds2  | Ds3   | Ds1  | Ds2  | Ds3  |
| DsaMS16          | 0.88 | 0.83 | 0.87 | 0.95 | 0.94 | 0.94 | 0.07  | 0.12 | 0.08  | 0.31 | 0.06 | 0.34 |
| DsaMS27          | 0.68 | 0.85 | 0.78 | 0.86 | 0.9  | 0.91 | 0.21  | 0.05 | 0.14  | 0.01 | 0.46 | 0.06 |
| DsaMS34          | 0.91 | 0.85 | 0.88 | 0.94 | 0.95 | 0.95 | 0.03  | 0.1  | 0.07  | 0.15 | 0.04 | 0.01 |
| DsaMS48          | 0.83 | 0.88 | 0.94 | 0.89 | 0.89 | 0.9  | 0.06  | 0.02 | -0.04 | 0.1  | 0.95 | 0    |
| Dvul33           | 0.84 | 0.86 | 0.85 | 0.85 | 0.86 | 0.85 | 0.01  | 0    | 0     | 0.29 | 0.96 | 0.53 |
| Dvul4            | 0.93 | 0.81 | 0.83 | 0.91 | 0.91 | 0.92 | -0.02 | 0.11 | 0.1   | 0.32 | 0.17 | 0.11 |
| Dvul84           | 0.83 | 0.76 | 0.76 | 0.84 | 0.86 | 0.83 | 0.01  | 0.12 | 0.08  | 0.07 | 0.18 | 0.1  |
| Ome138           | 0.67 | 0.78 | 0.61 | 0.93 | 0.93 | 0.9  | 0.28  | 0.16 | 0.33  | 0    | 0.03 | 0    |
| Ome154           | 0.21 | 0.24 | 0.35 | 0.37 | 0.27 | 0.39 | 0.43  | 0.13 | 0.12  | 0    | 0.14 | 0.01 |
| SL26             | 0.6  | 0.69 | 0.9  | 0.69 | 0.74 | 0.71 | 0.12  | 0.07 | -0.27 | 0.6  | 0.57 | 0.04 |

| <i>L. mormyrus</i> | Ho   |      |      | He   |      |      | Fis   |       |       | HWE  |      |      |
|--------------------|------|------|------|------|------|------|-------|-------|-------|------|------|------|
|                    | Lm1  | Lm2  | Lm3  | Lm1  | Lm2  | Lm3  | Lm1   | Lm2   | Lm3   | Lm1  | Lm2  | Lm3  |
| Ad05LM             | 0.97 | 0.73 | 0.69 | 0.93 | 0.81 | 0.75 | -0.05 | 0.1   | 0.08  | 0.4  | 0.08 | 0.02 |
| AD66LM             | 0.9  | 0.91 | 0.85 | 0.92 | 0.88 | 0.91 | 0.02  | -0.04 | 0.07  | 0.03 | 0.44 | 0    |
| Sal15LM            | 0.99 | 0.86 | 1    | 0.93 | 0.87 | 0.9  | -0.06 | 0.01  | -0.11 | 0.03 | 0.64 | 0.95 |
| SAI12LM            | 0.66 | 0.95 | 0.96 | 0.61 | 0.93 | 0.9  | -0.08 | -0.02 | -0.07 | 0.85 | 0.66 | 0.96 |
| Bd72LM             | 0.8  | 0.91 | 1    | 0.87 | 0.9  | 0.92 | 0.08  | -0.01 | -0.09 | 0.05 | 0.26 | 0.68 |
| SAI19LM            | 0.91 | 0.77 | 0.54 | 0.91 | 0.71 | 0.64 | 0     | -0.1  | 0.16  | 0.79 | 0.96 | 0.32 |
| Ad86LM             | 0.94 | 0.91 | 0.88 | 0.94 | 0.93 | 0.88 | 0     | 0.02  | -0.01 | 0.25 | 0.77 | 0.91 |
| Pb102LM            | 0.89 | 0.95 | 0.92 | 0.91 | 0.92 | 0.9  | 0.03  | -0.04 | -0.03 | 0.55 | 0.67 | 0.58 |
| Bd68LM             | 0.8  | 0.55 | 0.54 | 0.79 | 0.51 | 0.49 | -0.01 | -0.07 | -0.1  | 0.04 | 0.95 | 0.47 |

| <i>S. aurata</i> | Ho   |      |      | He   |      |      | Fis   |       |       | HWE  |      |      |
|------------------|------|------|------|------|------|------|-------|-------|-------|------|------|------|
|                  | Sa1  | Sa2  | Sa3  | Sa1  | Sa2  | Sa3  | Sa1   | Sa2   | Sa3   | Sa1  | Sa2  | Sa3  |
| SauD182          | 0.67 | 0.74 | 0.73 | 0.81 | 0.8  | 0.85 | 0.18  | 0.07  | 0.15  | 0.01 | 0.03 | 0.14 |
| SauE82           | 0.77 | 0.86 | 0.76 | 0.82 | 0.82 | 0.82 | 0.06  | -0.04 | 0.08  | 0.97 | 0.77 | 0.56 |
| Saul47           | 0.7  | 0.8  | 0.7  | 0.7  | 0.73 | 0.78 | 0     | -0.1  | 0.1   | 0.19 | 0.28 | 0.05 |
| C77b             | 0.69 | 0.26 | 0.5  | 0.55 | 0.34 | 0.6  | -0.25 | 0.23  | 0.17  | 0.51 | 0.09 | 0.38 |
| Cld.29.T         | 0.7  | 0.73 | 0.9  | 0.73 | 0.83 | 0.8  | 0.04  | 0.11  | -0.13 | 0.41 | 0.14 | 0.89 |
| Cld.35.H         | 0.5  | 0.67 | 0.7  | 0.7  | 0.7  | 0.76 | 0.29  | 0.05  | 0.08  | 0    | 0.08 | 0.1  |
| Ct27             | 0.89 | 0.96 | 0.95 | 0.92 | 0.92 | 0.94 | 0.02  | -0.05 | -0.02 | 0.02 | 0    | 0.03 |
| Fd.92.H          | 0.95 | 0.9  | 0.94 | 0.87 | 0.85 | 0.82 | -0.08 | -0.05 | -0.14 | 0.92 | 0.1  | 0.47 |
| Dd.16            | 0.77 | 0.87 | 0.79 | 0.88 | 0.87 | 0.85 | 0.13  | 0.01  | 0.07  | 0.1  | 0    | 0.58 |
| Dd.84            | 0.74 | 0.88 | 0.71 | 0.88 | 0.87 | 0.81 | 0.16  | 0     | 0.13  | 0.04 | 0.77 | 0.22 |
| Fd.79.T          | 0.72 | 0.71 | 0.68 | 0.65 | 0.65 | 0.63 | -0.11 | -0.08 | -0.08 | 0.31 | 0.96 | 0.8  |
| P20              | 0.95 | 0.97 | 0.92 | 0.77 | 0.83 | 0.76 | -0.24 | -0.17 | -0.2  | 0    | 0    | 0    |

| <i>C. puniceus</i> | Ho   |      |      | He   |      |      | Fis   |       |       | HWE  |      |      |
|--------------------|------|------|------|------|------|------|-------|-------|-------|------|------|------|
|                    | Cp1  | Cp2  | Cp3  | Cp1  | Cp2  | Cp3  | Cp1   | Cp2   | Cp3   | Cp1  | Cp2  | Cp3  |
| SL1                | 0.47 | 0.53 | 0.54 | 0.44 | 0.57 | 0.45 | -0.05 | 0.06  | -0.19 | 0.35 | 0.6  | 0.97 |
| SL17               | 0.93 | 1    | 0.97 | 0.96 | 0.97 | 0.97 | 0.03  | -0.03 | -0.01 | 0.54 | 0.03 | 0.46 |
| SL25               | 0.88 | 0.84 | 0.92 | 0.88 | 0.82 | 0.82 | 0     | -0.02 | -0.13 | 0.46 | 0.26 | 0.8  |
| SL26               | 0.77 | 0.79 | 0.69 | 0.7  | 0.69 | 0.73 | -0.1  | -0.15 | 0.05  | 0.83 | 0.33 | 0.33 |
| SL27               | 0.91 | 0.95 | 0.87 | 0.98 | 0.97 | 0.98 | 0.07  | 0.02  | 0.11  | 0.03 | 0    | 0    |
| SL29               | 0.63 | 0.63 | 0.54 | 0.62 | 0.6  | 0.64 | -0.02 | -0.05 | 0.16  | 0.72 | 0.51 | 0.24 |
| SL3                | 0.95 | 0.93 | 0.95 | 0.95 | 0.96 | 0.95 | 0     | 0.04  | 0     | 0.27 | 0.16 | 0.18 |
| SL33               | 0.91 | 0.98 | 0.9  | 0.91 | 0.9  | 0.89 | 0     | -0.09 | -0.01 | 0.1  | 0.38 | 0.51 |
| SL34               | 0.72 | 0.88 | 0.82 | 0.89 | 0.9  | 0.9  | 0.19  | 0.02  | 0.09  | 0.06 | 0.7  | 0.32 |
| SL35               | 0.47 | 0.44 | 0.56 | 0.82 | 0.81 | 0.85 | 0.43  | 0.45  | 0.34  | 0    | 0    | 0    |
| SL7                | 0.98 | 0.93 | 0.92 | 0.96 | 0.96 | 0.95 | -0.02 | 0.03  | 0.03  | 0.67 | 0.05 | 0.03 |

| <i>P. erythryus</i> | Ho   |      | He   |      | Fis   |       | HWE  |      |
|---------------------|------|------|------|------|-------|-------|------|------|
|                     | Pe1  | Pe2  | Pe1  | Pe2  | Pe1   | Pe2   | Pe1  | Pe2  |
| ms1                 | 0.58 | 0.58 | 0.62 | 0.7  | 0.08  | 0.17  | 0.55 | 0.05 |
| ms2                 | 0.18 | 0.23 | 0.99 | 0.97 | 0.82  | 0.77  | 0    | 0    |
| ms3                 | 0.77 | 0.64 | 0.87 | 0.88 | 0.11  | 0.27  | 0.02 | 0    |
| ms4                 | 0.66 | 0.82 | 0.93 | 0.95 | 0.29  | 0.13  | 0    | 0.06 |
| ms8                 | 0.69 | 0.61 | 0.95 | 0.96 | 0.27  | 0.36  | 0    | 0    |
| sl35                | 0.83 | 0.76 | 0.96 | 0.97 | 0.14  | 0.22  | 0    | 0    |
| sl33                | 0.72 | 0.61 | 0.67 | 0.57 | -0.07 | -0.08 | 0.04 | 1    |
| sl26                | 0.94 | 0.89 | 0.92 | 0.9  | -0.02 | 0.02  | 0.34 | 0.87 |
| ms5                 | 0.66 | 0.83 | 0.87 | 0.92 | 0.24  | 0.09  | 0    | 0.44 |
| sl1                 | 0.44 | 0.57 | 0.97 | 0.97 | 0.54  | 0.42  | 0    | 0    |
| sl27                | 0.59 | 0.49 | 0.97 | 0.96 | 0.38  | 0.49  | 0    | 0    |

| <i>C. fulva</i> | Ho   |      |      |      | He   |      |      |      | Fis   |       |       |       | HWE  |      |      |
|-----------------|------|------|------|------|------|------|------|------|-------|-------|-------|-------|------|------|------|
|                 | Cf1  | Cf2  | Cf3  | Cf4  | Cf1  | Cf2  | Cf3  | Cf4  | Cf1   | Cf2   | Cf3   | Cf4   | Cf1  | Cf2  | Cf3  |
| CA_002          | 0.98 | 1    | 0.97 | 0.95 | 0.95 | 0.96 | 0.96 | 0.95 | -0.03 | -0.05 | -0.01 | 0     | 0.56 | 0.2  | 0.43 |
| CA_004          | 0.56 | 0.58 | 0.64 | 0.53 | 0.54 | 0.6  | 0.6  | 0.58 | -0.03 | 0.03  | -0.06 | 0.09  | 0.92 | 0.3  | 0.8  |
| CA_008          | 0.72 | 0.74 | 0.71 | 0.71 | 0.76 | 0.71 | 0.73 | 0.71 | 0.06  | -0.03 | 0.03  | 0     | 0.01 | 0.43 | 0.42 |
| GATA_034        | 0.8  | 0.91 | 0.85 | 0.88 | 0.85 | 0.86 | 0.87 | 0.85 | 0.06  | -0.06 | 0.03  | -0.04 | 0.26 | 0.16 | 0.04 |
| Cfu9            | 0.03 | 0.05 | 0.11 | 0.05 | 0.03 | 0.04 | 0.11 | 0.05 | -0.01 | -0.01 | -0.04 | -0.01 | 1    | 1    | 1    |
| Cfu10           | 0    | 0    | 0.16 | 0.01 | 0    | 0    | 0.16 | 0.01 | NA    | NA    | 0.03  | 0     | 1    | 1    | 0.56 |
| Cfu14           | 0.02 | 0.08 | 0.1  | 0.05 | 0.02 | 0.08 | 0.11 | 0.05 | 0     | -0.02 | 0.13  | -0.02 | 1    | 1    | 0.28 |
| Cfu17           | 0.14 | 0.05 | 0.17 | 0.09 | 0.13 | 0.05 | 0.16 | 0.09 | -0.07 | -0.02 | -0.07 | -0.03 | 1    | 1    | 1    |
| Cfu18           | 0.25 | 0.25 | 0.25 | 0.2  | 0.29 | 0.32 | 0.32 | 0.23 | 0.13  | 0.2   | 0.22  | 0.14  | 0.27 | 0.05 | 0.15 |
| Cfu20           | 0.06 | 0.05 | 0.01 | 0.05 | 0.06 | 0.05 | 0.01 | 0.05 | -0.02 | 0.15  | 0     | -0.01 | 1    | 0.02 | 1    |
| Cfu21           | 0.89 | 0.89 | 0.91 | 0.93 | 0.92 | 0.93 | 0.92 | 0.92 | 0.03  | 0.04  | 0.01  | -0.01 | 0.18 | 0.18 | 0.35 |
| Cfu23           | 0.71 | 0.64 | 0.75 | 0.61 | 0.67 | 0.6  | 0.69 | 0.62 | -0.06 | -0.07 | -0.09 | 0.02  | 0.85 | 0.14 | 0.34 |
| Cfu25           | 0.69 | 0.7  | 0.76 | 0.74 | 0.67 | 0.68 | 0.69 | 0.7  | -0.03 | -0.03 | -0.1  | -0.06 | 0.2  | 0.65 | 0.51 |
| Cfu26           | 0.63 | 0.7  | 0.66 | 0.62 | 0.71 | 0.76 | 0.74 | 0.71 | 0.1   | 0.08  | 0.11  | 0.13  | 0.19 | 0.14 | 0.34 |
| Cfu43           | 0.44 | 0.55 | 0.5  | 0.47 | 0.42 | 0.55 | 0.48 | 0.44 | -0.06 | -0.01 | -0.03 | -0.08 | 0.67 | 0.07 | 0.63 |
| Cfu46           | 0.03 | 0.07 | 0.02 | 0.03 | 0.05 | 0.07 | 0.02 | 0.03 | 0.39  | -0.03 | -0.01 | -0.01 | 0.05 | 1    | 1    |
| Cfu52           | 0.79 | 0.82 | 0.83 | 0.84 | 0.8  | 0.8  | 0.78 | 0.82 | 0.02  | -0.02 | -0.06 | -0.03 | 0.66 | 0.97 | 0.08 |
| Cfu57           | 0.8  | 0.84 | 0.81 | 0.81 | 0.78 | 0.79 | 0.77 | 0.76 | -0.03 | -0.06 | -0.06 | -0.07 | 0.67 | 0.24 | 0.81 |
| Cfu69           | 0.42 | 0.55 | 0.38 | 0.47 | 0.45 | 0.5  | 0.42 | 0.49 | 0.05  | -0.1  | 0.09  | 0.05  | 0.76 | 0.96 | 0.25 |
| Cfu70           | 0.65 | 0.65 | 0.68 | 0.73 | 0.71 | 0.7  | 0.74 | 0.73 | 0.09  | 0.08  | 0.09  | 0.01  | 0.44 | 0.17 | 0.01 |
| Cfu72           | 0.85 | 0.88 | 0.94 | 0.88 | 0.89 | 0.91 | 0.91 | 0.9  | 0.05  | 0.03  | -0.04 | 0.02  | 0.33 | 0.14 | 0.94 |
| Cfu75           | 0.92 | 0.85 | 0.88 | 0.85 | 0.9  | 0.88 | 0.89 | 0.9  | -0.02 | 0.03  | 0.01  | 0.06  | 0.76 | 0.1  | 0.43 |
| Cfu80           | 0.68 | 0.7  | 0.58 | 0.74 | 0.68 | 0.69 | 0.65 | 0.67 | 0     | -0.02 | 0.11  | -0.1  | 0.17 | 0.92 | 0.54 |
| Cfu82           | 0.32 | 0.36 | 0.44 | 0.39 | 0.28 | 0.35 | 0.47 | 0.38 | -0.13 | -0.04 | 0.06  | -0.04 | 0.4  | 1    | 0.67 |

| <i>E. guttatus</i> | Ho   |      |      |      | He   |      |      |      | Fis   |       |       |       | HWE  |      |      |      |
|--------------------|------|------|------|------|------|------|------|------|-------|-------|-------|-------|------|------|------|------|
|                    | Eg1  | Eg2  | Eg3  | Eg4  | Eg1  | Eg2  | Eg3  | Eg4  | Eg1   | Eg2   | Eg3   | Eg4   | Eg1  | Eg2  | Eg3  | Eg4  |
| CA_002             | 0.93 | 0.91 | 0.96 | 0.96 | 0.9  | 0.91 | 0.9  | 0.91 | -0.03 | 0     | -0.06 | -0.06 | 0.78 | 0.31 | 0.25 | 0.13 |
| CA_004             | 0.85 | 0.91 | 0.89 | 0.89 | 0.89 | 0.91 | 0.89 | 0.91 | 0.05  | 0     | 0     | 0.02  | 0.53 | 0.22 | 0.53 | 0.24 |
| CA_008             | 0.96 | 0.94 | 0.98 | 0.97 | 0.94 | 0.95 | 0.94 | 0.94 | -0.02 | 0.01  | -0.04 | -0.03 | 0.21 | 0.36 | 0.72 | 0.77 |
| GATA_002           | 0.98 | 0.91 | 0.95 | 0.98 | 0.97 | 0.97 | 0.97 | 0.97 | -0.01 | 0.06  | 0.02  | -0.01 | 0.03 | 0.05 | 0.2  | 0.45 |
| GATA_003           | 0.74 | 0.69 | 0.81 | 0.68 | 0.75 | 0.74 | 0.75 | 0.72 | 0.02  | 0.07  | -0.08 | 0.05  | 0.96 | 0.8  | 0.5  | 0.17 |
| GATA_015           | 0.8  | 0.82 | 0.81 | 0.88 | 0.88 | 0.89 | 0.89 | 0.88 | 0.09  | 0.08  | 0.09  | 0     | 0.14 | 0.59 | 0    | 0.57 |
| GATA_018           | 0.89 | 0.9  | 0.93 | 0.94 | 0.95 | 0.94 | 0.95 | 0.95 | 0.06  | 0.04  | 0.02  | 0.01  | 0.68 | 0.11 | 0.02 | 0.34 |
| GATA_023           | 0.91 | 0.89 | 0.89 | 0.87 | 0.91 | 0.91 | 0.91 | 0.92 | 0     | 0.02  | 0.02  | 0.05  | 0.66 | 0.51 | 0.16 | 0.32 |
| GATA_034           | 0.86 | 0.92 | 0.91 | 0.87 | 0.89 | 0.88 | 0.89 | 0.88 | 0.04  | -0.04 | -0.01 | 0.01  | 0.12 | 1    | 0.24 | 0.9  |
| GATA_057           | 0.89 | 0.92 | 0.95 | 0.9  | 0.9  | 0.88 | 0.89 | 0.89 | 0.01  | -0.04 | -0.06 | -0.01 | 0.74 | 0.8  | 0.1  | 0.63 |
| GATA_065           | 0.83 | 0.89 | 0.82 | 0.86 | 0.85 | 0.87 | 0.86 | 0.86 | 0.02  | -0.02 | 0.04  | 0     | 0.71 | 0.39 | 0.16 | 0.96 |
| Cfu9               | 0    | 0.17 | 0.04 | 0.1  | 0    | 0.16 | 0.04 | 0.1  | NA    | -0.08 | -0.02 | -0.05 | 1    | 1    | 1    | 1    |
| Cfu10              | 0.13 | 0.12 | 0.12 | 0.13 | 0.12 | 0.11 | 0.11 | 0.14 | -0.04 | -0.04 | -0.05 | 0.09  | 1    | 1    | 1    | 0.32 |
| Cfu14              | 0.32 | 0.19 | 0.35 | 0.23 | 0.29 | 0.22 | 0.33 | 0.24 | -0.09 | 0.13  | -0.07 | 0.04  | 0.67 | 0.25 | 0.92 | 0.08 |
| Cfu20              | 0.92 | 0.85 | 0.89 | 0.85 | 0.89 | 0.86 | 0.88 | 0.87 | -0.03 | 0.01  | -0.02 | 0.03  | 0.04 | 0.9  | 0.2  | 0.64 |
| Cfu25              | 0.03 | 0.05 | 0.05 | 0.01 | 0.03 | 0.05 | 0.05 | 0.01 | -0.01 | -0.02 | -0.02 | 0     | 1    | 1    | 1    | 1    |
| Cfu43              | 0.33 | 0.23 | 0.31 | 0.35 | 0.35 | 0.23 | 0.32 | 0.33 | 0.07  | 0.01  | 0.03  | -0.06 | 0.52 | 0.65 | 0.11 | 0.76 |
| Cfu57              | 0.88 | 0.92 | 0.97 | 0.87 | 0.93 | 0.93 | 0.94 | 0.92 | 0.05  | 0.01  | -0.02 | 0.06  | 0.18 | 0.34 | 0.25 | 0.5  |
| Cfu80              | 0.74 | 0.72 | 0.69 | 0.79 | 0.72 | 0.73 | 0.74 | 0.75 | -0.04 | 0.01  | 0.07  | -0.05 | 0.52 | 0.38 | 0.25 | 0.42 |



**Table S2.**  $F_{st}$  (microsatellite genotypes) values for pairwise comparisons of different populations of the seven species under investigation (lower half of the matrix). In the upper half the correspondent 95% confidence intervals, in brackets. Values in bold reflect statistically significant comparisons.

|                      |               |                        |                        |                        |                        |
|----------------------|---------------|------------------------|------------------------|------------------------|------------------------|
| <i>E. guttatus</i>   | Eg1           | Eg2                    | Eg3                    | Eg4                    |                        |
| Eg1                  |               | (-0.0004-0.0044)       | (-0.0029-0.0011)       | (-0.0017-0.0030)       |                        |
| Eg2                  | 0.0017        |                        | (-0.0010-0.0036)       | (-0.0014-0.0032)       |                        |
| Eg3                  | -0.001        | 0.0012                 |                        | (-0.0017-0.0024)       |                        |
| Eg4                  | 5.00E-04      | 7.00E-04               | 2.00E-04               |                        |                        |
| <i>C. fulva</i>      | Cf1           | Cf2                    | Cf3                    | Cf4                    |                        |
| Cf1                  |               | (-0.0012-.0057)        | <b>(0.0020-0.0096)</b> | (-0.0028-0.0020)       |                        |
| Cf2                  | 0.0018        |                        | <b>(0.0007-0.0074)</b> | (-0.0019-0.0041)       |                        |
| Cf3                  | <b>0.0054</b> | <b>0.0037</b>          |                        | (-0.0008-0.0060)       |                        |
| Cf4                  | -5.00E-04     | 6.00E-04               | 2.50E-03               |                        |                        |
| <i>D. sargus</i>     | Ds1           | Ds2                    | Ds3                    |                        |                        |
| Ds1                  |               | (-0.0371-0.0474)       | (-0.0039-0.0877)       |                        |                        |
| Ds2                  | -0.001        |                        | (-0.0166-0.0487)       |                        |                        |
| Ds3                  | 0.0051        | 0.0019                 |                        |                        |                        |
| <i>C. puniceus</i>   | Cp1           | Cp2                    | Cp3                    |                        |                        |
| Cp1                  |               | (-0.0067-0.0104)       | (-0.0061-0.0088)       |                        |                        |
| Cp2                  | 9.00E-04      |                        | (-0.0047-0.0114)       |                        |                        |
| Cp3                  | 5.00E-04      | 0.002                  |                        |                        |                        |
| <i>L. mormyrus</i>   | Lm1           | Lm2                    | Lm3                    | Lm4                    | Lm5                    |
| Lm1                  |               | <b>(0.0025-0.0145)</b> | <b>(0.0211-0.0381)</b> | <b>(0.0177-0.0430)</b> | <b>(0.0319-0.0583)</b> |
| Lm2                  | <b>0.0079</b> |                        | <b>(0.0577-0.0759)</b> | <b>(0.0496-0.0777)</b> | <b>(0.0693-0.0960)</b> |
| Lm3                  | <b>0.0294</b> | <b>0.0664</b>          |                        | <b>(0.0016-0.0216)</b> | <b>(0.0042-0.0202)</b> |
| Lm4                  | <b>0.0302</b> | <b>0.064</b>           | <b>0.0104</b>          |                        | (-0.0026-0.0309)       |
| Lm5                  | <b>0.0430</b> | <b>0.0804</b>          | <b>0.0112</b>          | 0.0125                 |                        |
| <i>S. aurata</i>     | Sa1           | Sa2                    | Sa3                    |                        |                        |
| Sa1                  |               | <b>(0.0038-0.0261)</b> | (-0.0005-0.0210)       |                        |                        |
| Sa2                  | <b>0.0131</b> |                        | (-0.0043-0.0197)       |                        |                        |
| Sa3                  | 0.009         | 0.0061                 |                        |                        |                        |
| <i>P. erythrinus</i> | Pe2           |                        |                        |                        |                        |
| Pe1                  | -0.0011       |                        |                        |                        |                        |

**Table S3.** Comparison of known mortality and fecundity rates from literature with average mortality data (across all size classes) calculated with different methods and range of fecundity; proportion of the terminal sex ( $S$ ; males in protogynous species and females in protandrous species) obtained from literature and calculated for each species.

| Species              |    | Fixed Mortality (Fishbase) | Calculated Mortality (Charnov et al., 2013) | Calculated mortality (adjusted for age) | Range of Fecundity                        | Calculated Range of Fecundity                         | M:F ratio           | Calculated M:F (mean) | Sex <sub>f</sub> | Sex <sub>i</sub>   |
|----------------------|----|----------------------------|---------------------------------------------|-----------------------------------------|-------------------------------------------|-------------------------------------------------------|---------------------|-----------------------|------------------|--------------------|
| <i>C. puniceus</i>   | PG | 0.35*                      | 0.45                                        | 0.57                                    | 18,582-144,820 <sup>31</sup>              | 31,391-139,159                                        | 1:9.5 <sup>76</sup> | 1:7.28                | 25%              | 7% M <sub>i</sub>  |
| <i>P. erythrinus</i> | PG | 0.29*                      | 0.27                                        | 0.34                                    |                                           | 207,167-17,359,010                                    | 1:3                 |                       |                  |                    |
| <i>S. cantharus</i>  | PG | 0.35                       | 0.41                                        | 0.53                                    | 31,670-554,070 <sup>35</sup> (7yrs)       | 30,792-1,038,601 (580,335 <sup>7yrs</sup> )           | 1:3                 |                       | 30%              | 7%                 |
| <i>S. pulcher</i>    | PG | 0.25                       | 0.23                                        | 0.28                                    | 35,000-1,686,925 <sup>37</sup> (11-12yrs) | 33,679-6,648,226<br>1,819,030 <sup>(11-12yrs)</sup>   |                     |                       |                  |                    |
| <i>D. sargus</i>     | PA | 0.28*                      | 0.37                                        | 0.48                                    | Not available                             | 86,385-1,902,532                                      | 1:2                 | 1:56                  | 66.5%            | 10% F <sub>i</sub> |
| <i>L. mormyrus</i>   | PA | 0.47                       | 0.37                                        | 0.48                                    | Not available                             | 83,446-779,413                                        | 1:2.1 <sup>76</sup> |                       |                  |                    |
| <i>S. aurata</i>     | PA | 0.6                        | 0.32                                        | 0.43                                    | Not available                             | 383,712-5,884,075                                     |                     |                       |                  |                    |
| <i>L. calcarifer</i> | PA | 0.27                       | 0.26                                        | 0.32                                    | 46,000,000 <sup>77</sup> (15yrs)          | 5,142,781-40,360,174<br>30,528,249 <sup>(15yrs)</sup> |                     |                       |                  |                    |

\* with updated  $L_{inf}$

**Table S4.** Microsatellite loci for the five sparid species under investigation

|                           | <i>C. puniceus</i> | <i>P. erythrinus</i> | <i>S. aurata</i> | <i>L. mormyrus</i> | <i>D. sargus</i> |
|---------------------------|--------------------|----------------------|------------------|--------------------|------------------|
| PAGEERY MS1 <sup>78</sup> |                    | ✓                    |                  |                    |                  |
| PAGEERY MS2 <sup>78</sup> |                    | ✓                    |                  |                    |                  |
| PAGEERY MS3 <sup>78</sup> |                    | ✓                    |                  |                    |                  |
| PAGEERY MS4 <sup>78</sup> |                    | ✓                    |                  |                    |                  |
| PAGEERY MS5 <sup>78</sup> |                    | ✓                    |                  |                    |                  |
| PAGEERY MS8 <sup>78</sup> |                    | ✓                    |                  |                    |                  |
| SL1 <sup>79</sup>         | ✓                  | ✓                    |                  |                    |                  |
| SL3 <sup>79</sup>         | ✓                  |                      |                  |                    |                  |
| SL7 <sup>79</sup>         | ✓                  |                      |                  |                    |                  |
| SL17 <sup>79</sup>        | ✓                  |                      |                  |                    |                  |
| SL25 <sup>79</sup>        | ✓                  |                      |                  |                    |                  |
| SL26 <sup>79</sup>        | ✓                  | ✓                    |                  |                    | ✓                |
| SL27 <sup>79</sup>        | ✓                  | ✓                    |                  |                    |                  |
| SL29 <sup>79</sup>        | ✓                  |                      |                  |                    |                  |
| SL33 <sup>79</sup>        | ✓                  | ✓                    |                  |                    |                  |
| SL34 <sup>79</sup>        | ✓                  |                      |                  |                    |                  |
| SL35 <sup>79</sup>        |                    | ✓                    |                  |                    |                  |
| SauD182 <sup>80</sup>     |                    |                      | ✓                |                    |                  |
| SauE82 <sup>80</sup>      |                    |                      | ✓                |                    |                  |
| SauI47 <sup>80</sup>      |                    |                      | ✓                |                    |                  |
| C77b <sup>81</sup>        |                    |                      | ✓                |                    |                  |
| Cld-29-T <sup>81</sup>    |                    |                      | ✓                |                    |                  |
| Cld-35-H <sup>81</sup>    |                    |                      | ✓                |                    |                  |
| Ct27 <sup>81</sup>        |                    |                      | ✓                |                    |                  |
| Fd-92-H <sup>81</sup>     |                    |                      | ✓                |                    |                  |
| Dd-16 <sup>81</sup>       |                    |                      | ✓                |                    |                  |
| Dd-84 <sup>81</sup>       |                    |                      | ✓                |                    |                  |
| Fd-79-T <sup>81</sup>     |                    |                      | ✓                |                    |                  |
| P20 <sup>81</sup>         |                    |                      | ✓                |                    |                  |
| Ad-10* <sup>81</sup>      |                    |                      | ✓                |                    |                  |
| Bld-10-T* <sup>81</sup>   |                    |                      | ✓                |                    |                  |
| Ed-02** <sup>81</sup>     |                    |                      | ✓                |                    |                  |
| Ad05 <sup>81</sup>        |                    |                      |                  | ✓                  |                  |
| Ad66 <sup>81</sup>        |                    |                      |                  | ✓                  |                  |
| SaL1 <sup>82</sup>        |                    |                      |                  | ✓                  |                  |
| Pb-OVI-D102 <sup>83</sup> |                    |                      |                  | ✓                  |                  |
| LM12 <sup>84</sup>        |                    |                      |                  | ✓                  |                  |
| LM86 <sup>84</sup>        |                    |                      |                  | ✓                  |                  |
| LM68 <sup>84</sup>        |                    |                      |                  | ✓                  |                  |
| LM72 <sup>84</sup>        |                    |                      |                  | ✓                  |                  |
| LM19 <sup>84</sup>        |                    |                      |                  | ✓                  |                  |
| DsaMS16 <sup>85</sup>     |                    |                      |                  |                    | ✓                |
| DsaMS27 <sup>85</sup>     |                    |                      |                  |                    | ✓                |
| DsaMS34 <sup>85</sup>     |                    |                      |                  |                    | ✓                |
| DsaMS48 <sup>85</sup>     |                    |                      |                  |                    | ✓                |
| Dvul33 <sup>86</sup>      |                    |                      |                  |                    | ✓                |
| Dvul4 <sup>86</sup>       |                    |                      |                  |                    | ✓                |
| Dvul84 <sup>86</sup>      |                    |                      |                  |                    | ✓                |
| Omel38 <sup>87</sup>      |                    |                      |                  |                    | ✓                |
| Omel54 <sup>87</sup>      |                    |                      |                  |                    | ✓                |
| Omel58 <sup>87</sup>      |                    |                      |                  |                    | ✓                |
|                           | 10                 | 11                   | 15               | 9                  | 11               |

\* possibly under directional selection; \*\* possibly under balancing selection.

## References not in the main text

- 76 Mariani, S., Sala-Bozano, M., Chopelet, J. & Benvenuto, C. Spatial and temporal patterns of size-at-sex-change in two exploited coastal fish. *Environ. Biol. Fishes* **96**(4), 535-541 (2013).
- 77 Davis, T. L. O. Estimation of fecundity in barramundi, *Lates calcarifer* (Bloch), using an automatic particle counter. *Aust. J. Mar. Freshw. Res.* **35**(1), 111-118 (1984).
- 78 Ramšak, A., Garoia, F., Guarniero, I., Mannini, P. & Tinti, F. Novel polymorphic microsatellite markers for the common pandora (*Pagellus erythrinus*). *Mol. Ecol. Notes* **3**, 553-555 (2003).
- 79 Chopelet, J., Helyar, S., Mann, B. & Mariani, S. Novel polymorphic microsatellite loci for the protogynous hermaphrodite slinger sea bream (*Chrysoblephus puniceus*, Sparidae). *Mol Ecol. Resour.* **9**, 1223-1226 (2009).
- 80 Launey, S., Krieg, F., Haffray, P., Bruant, J. S., Vannier, A. & Guyomard, R. Twelve new microsatellite markers for gilted seabream (*Sparus aurata* L.): characterization, polymorphism and linkage. *Mol. Ecol. Notes* **3**, 457-459 (2003).
- 81 Franch, R., Louro, B., Tsalavouta, M., Chatziplis, D., Tsigenopoulos, C. S., Sarropoulou, E., Antonello, J., Magoulas, A., Mylonas, C. C., Babbucci, M., Patarnello, T., Power, D. M., Kotoulas, G. & Bargelloni, L. A genetic linkage map of the hermaphrodite teleost fish *Sparus aurata* L. *Genetics* **174**, 851-861 (2006).
- 82 Brown, R. C., Tsalavouta, M., Terzoglou, V., Magoulas, A. & McAndrew, B. Additional microsatellites for *Sparus aurata* and cross-species amplification within the Sparidae family. *Mol. Ecol. Notes* **5**, 605-607 (2005).
- 83 Piñera, J. A., Bernardo, D., Blanco, G., Vázquez, E. & Sánchez, J. Isolation and characterization of polymorphic microsatellite markers in *Pagellus bogaraveo*, and cross-species amplification in *Sparus aurata* and *Dicentrarchus labrax*. *Mol. Ecol. Notes* **6**, 33-35 (2006).
- 84 Sala-Bozano, M., Tsalavouta, M. & Mariani, S. Isolation and characterisation of new polymorphic microsatellite markers for the striped sea bream (*Lithognathus mormyrus*). *Conserv. Genet.* **10**, 1507-1509 (2009).
- 85 Pérez, L., Infante, C., Ponce, M., Crespo, A., Zuasti, E., Funes, V., Catanese, G. & Manchado, M. Characterization of eight microsatellite markers in the white sea bream, *Diplodus sargus* (Teleostei, Sparidae). *Mol. Ecol. Resour.* **8**, 1291-1293 (2008).

- 86 Roques, S., Galarza, J. A., Macpherson, E., Turner, G. F. & Rico, C. Isolation and characterization of nine polymorphic microsatellite markers in the two-banded sea bream (*Diplodus vulgaris*) and cross-species amplification in the white sea bream (*Diplodus sargus*) and the saddled bream (*Oblada melanura*). *Mol. Ecol. Notes* **7**, 661-663 (2007).
- 87 Roques, S., Galarza, J. A., Macpherson, E., Turner, G. F., Carreras-Carbonell, J., Rico, C. Isolation of eight microsatellites loci from the saddled bream, *Oblada melanura* and cross-species amplification in two sea bream species of the genus *Diplodus*. *Conserv. Genet.* **8**, 1255-1257 (2007).
